# Supplementary material
Source: publisher site journal article supplement (https://www.dovepress.com/article/482543)
Supplement: Supplementary file 1 [file get_supplementary_file.php]

Supplementary Box 1

| Search strategy |
| --- |
| ((((TS=("personalized medicine")) OR TS=("personalised medicine")) OR TS=("precision medicine")) OR TS=("Precise Medicine")) OR TS=("Individualized Medicine") and 2022 or 2021 or 2020 or 2019 or 2018 or 2017 or 2016 or 2015 or 2014 or 2013 or 2012 or 2011 or 2010 or 2009 or 2008 or 2007 or 2006 or 2005 or 2004 or 2003 or 2002 or 2001 or 2000 or 1999 (Publication Years) and Article or Review Article (Document Types) and English (Languages) |


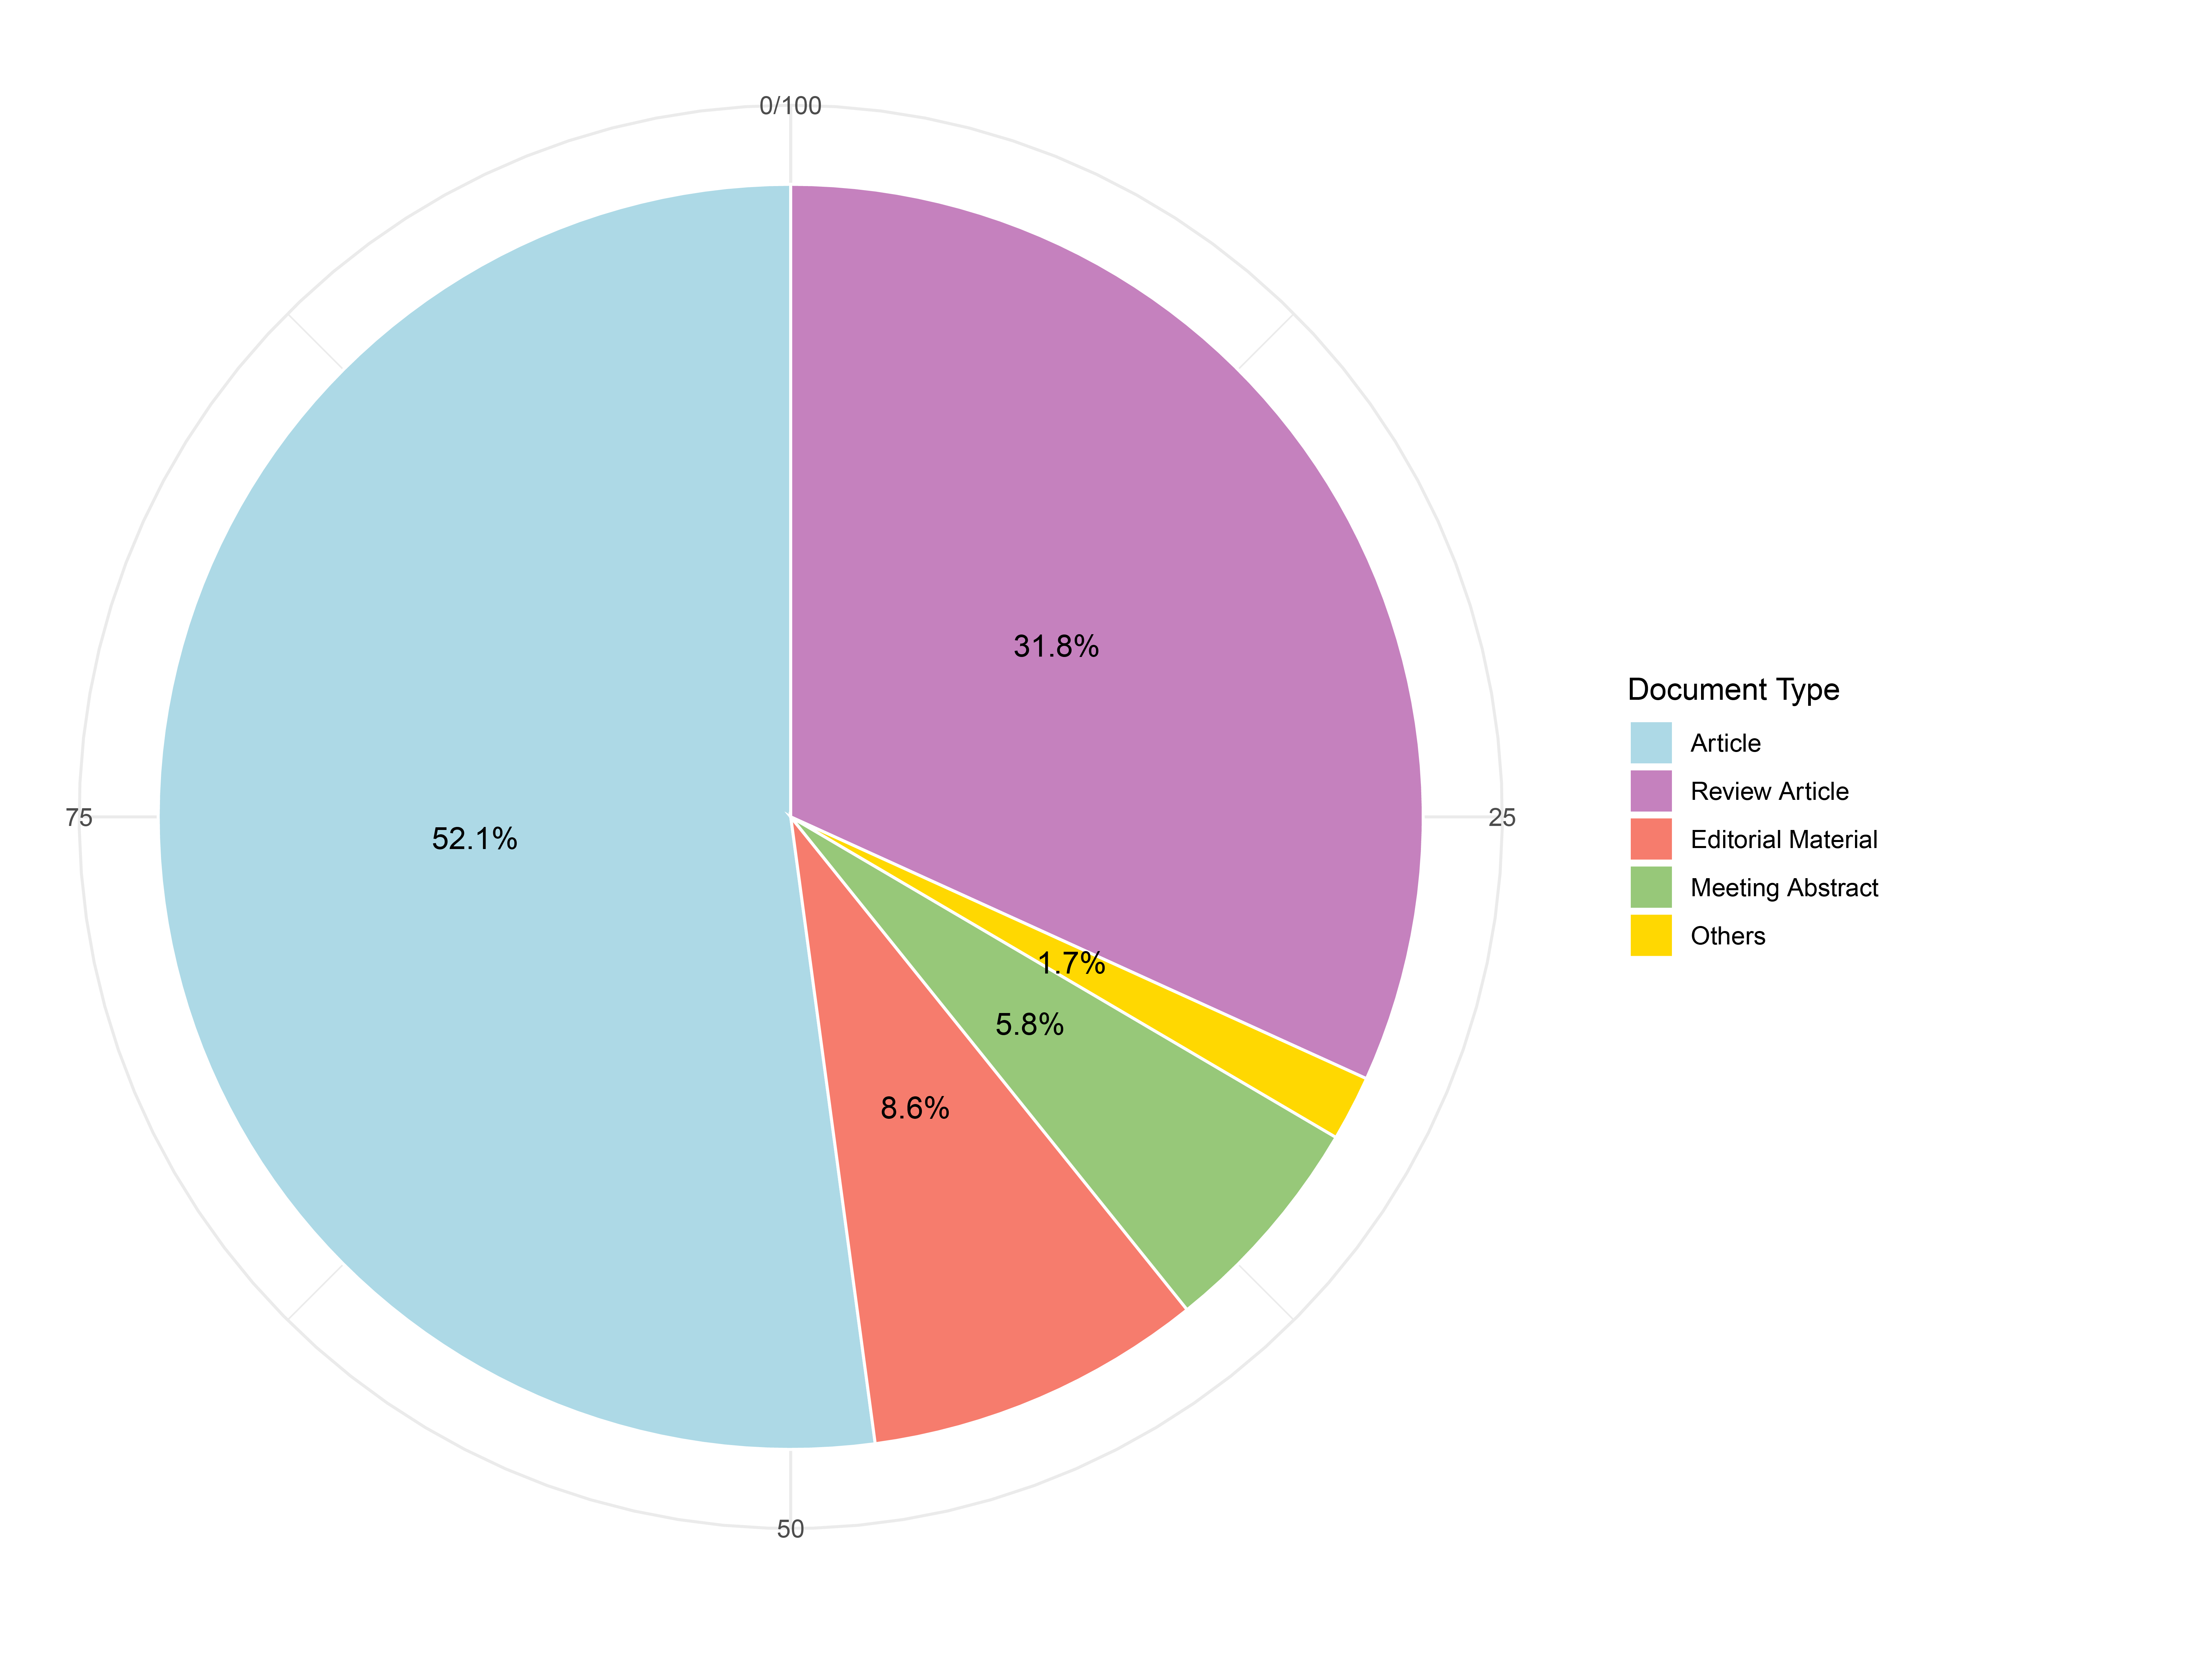


Supplementary Figure 1 Types of article type in the initial search.


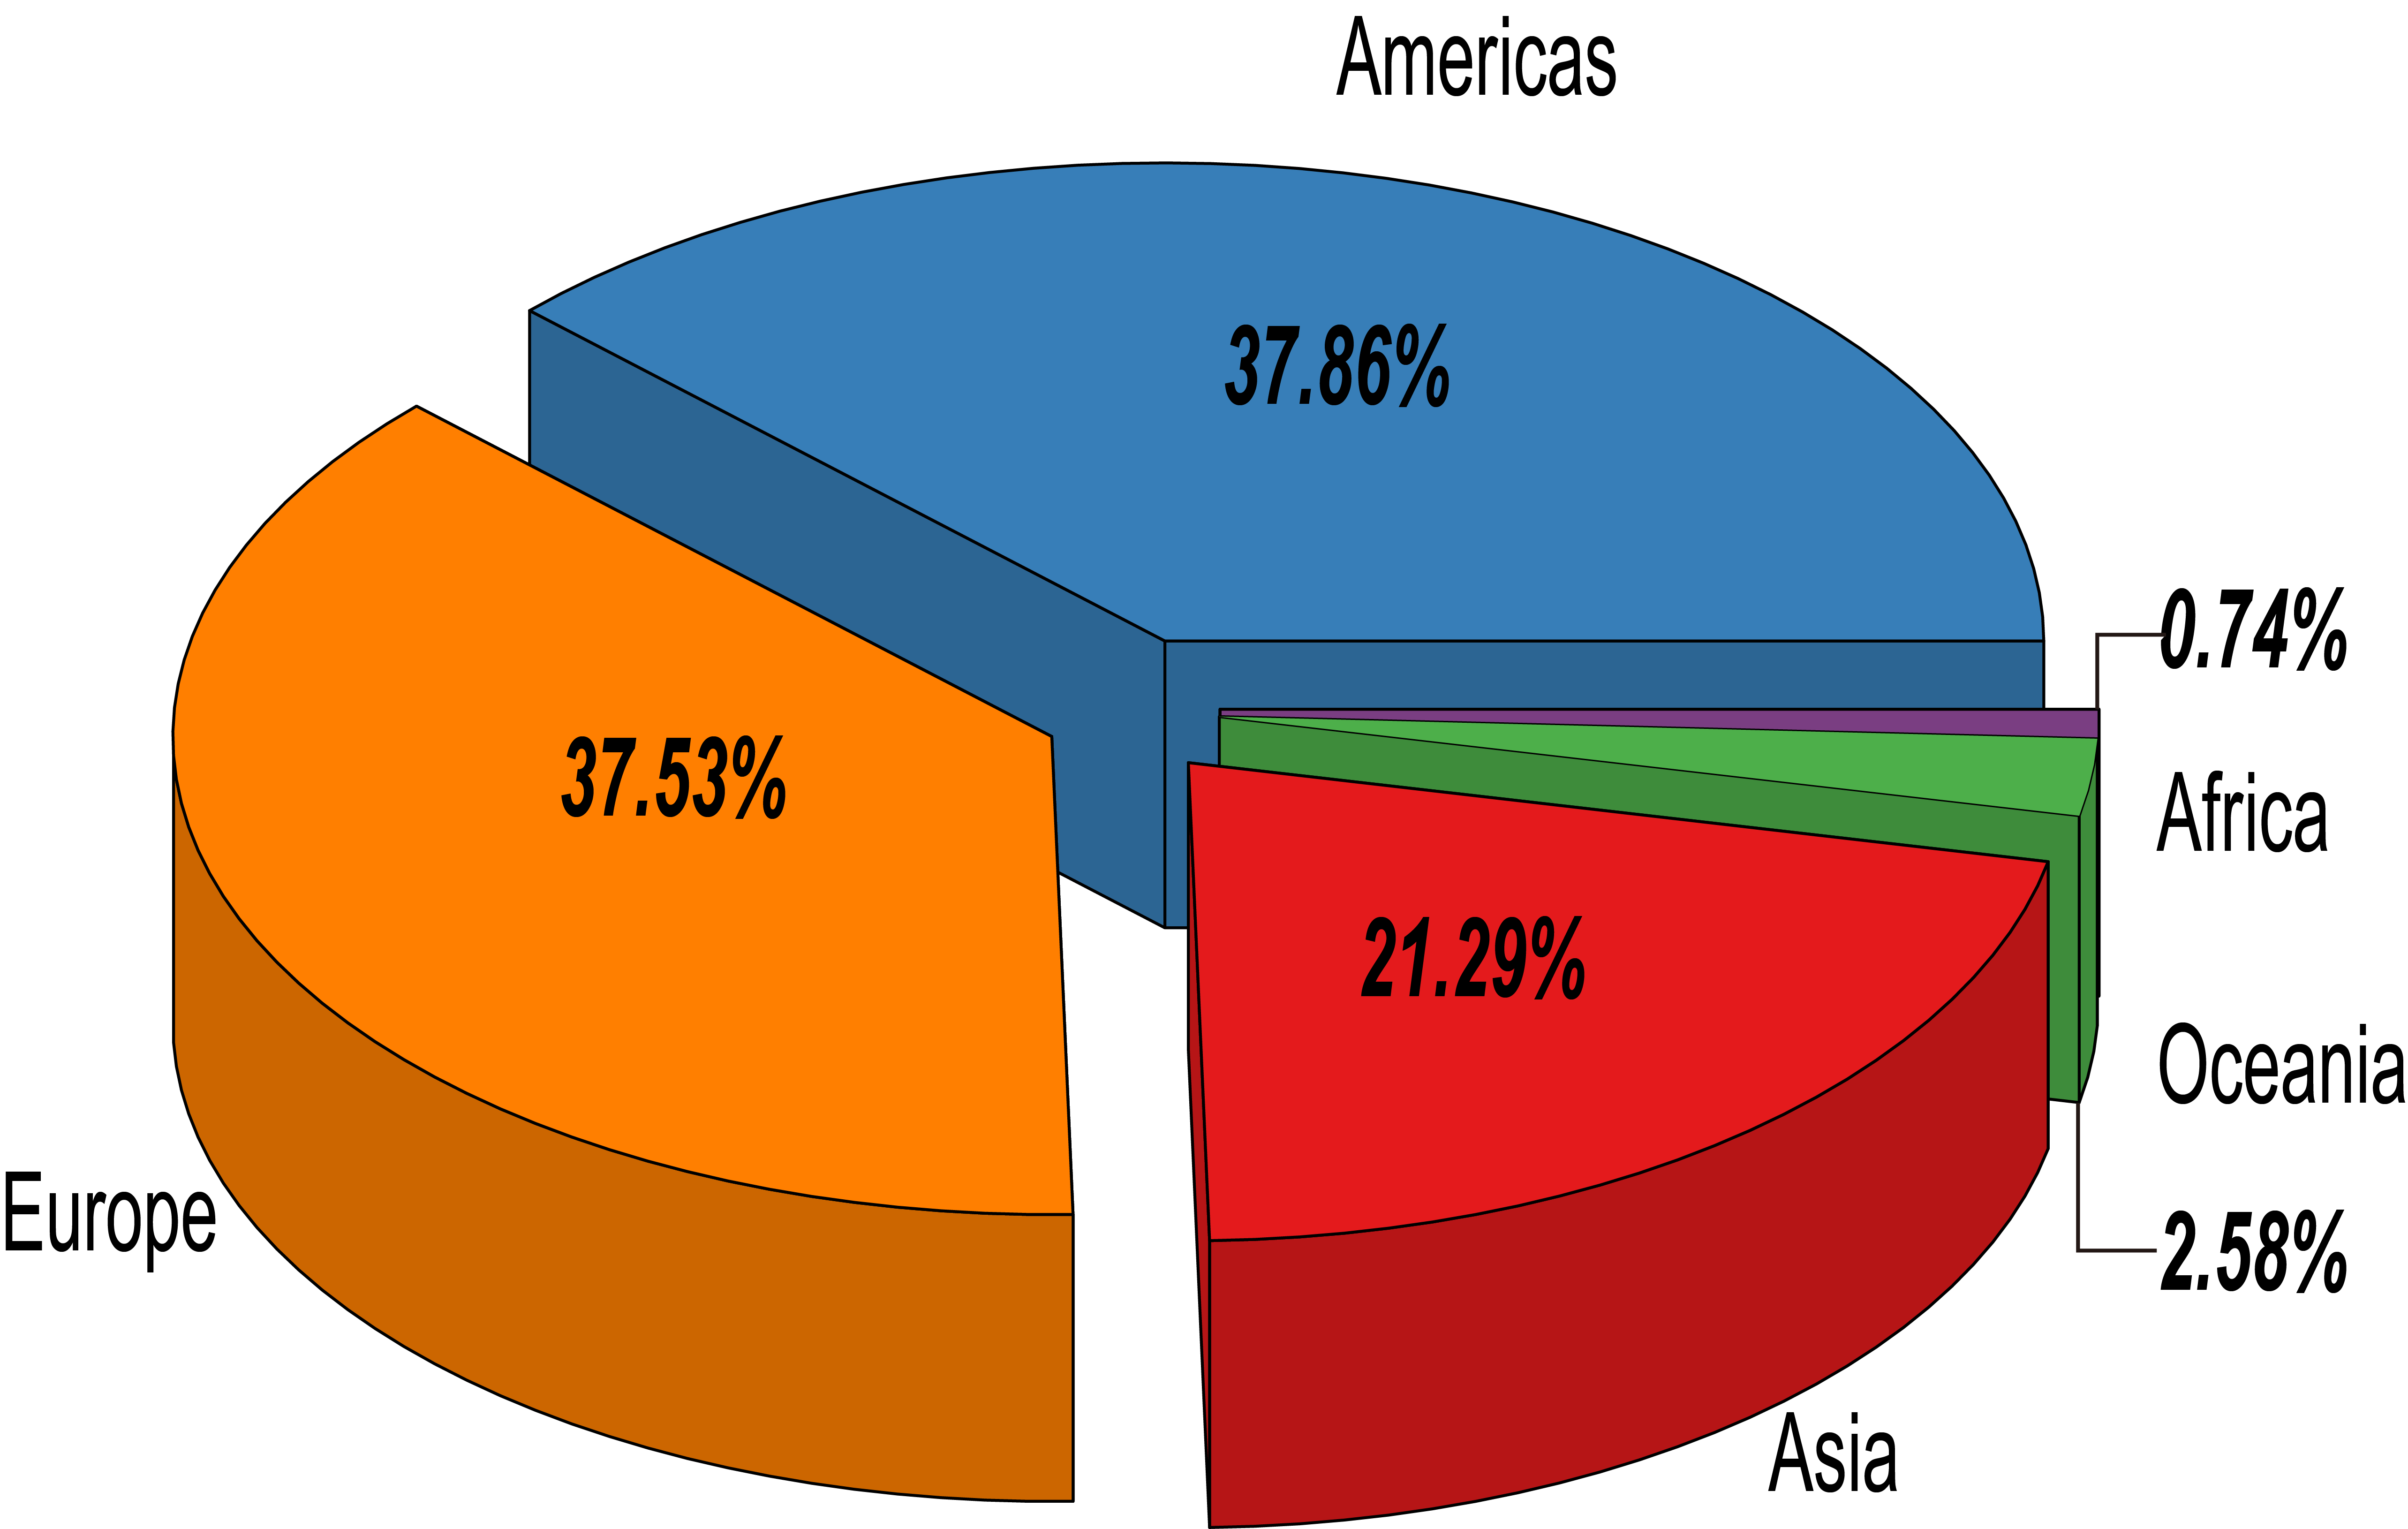


Supplementary Figure 2 Regional distribution of precision medicine.


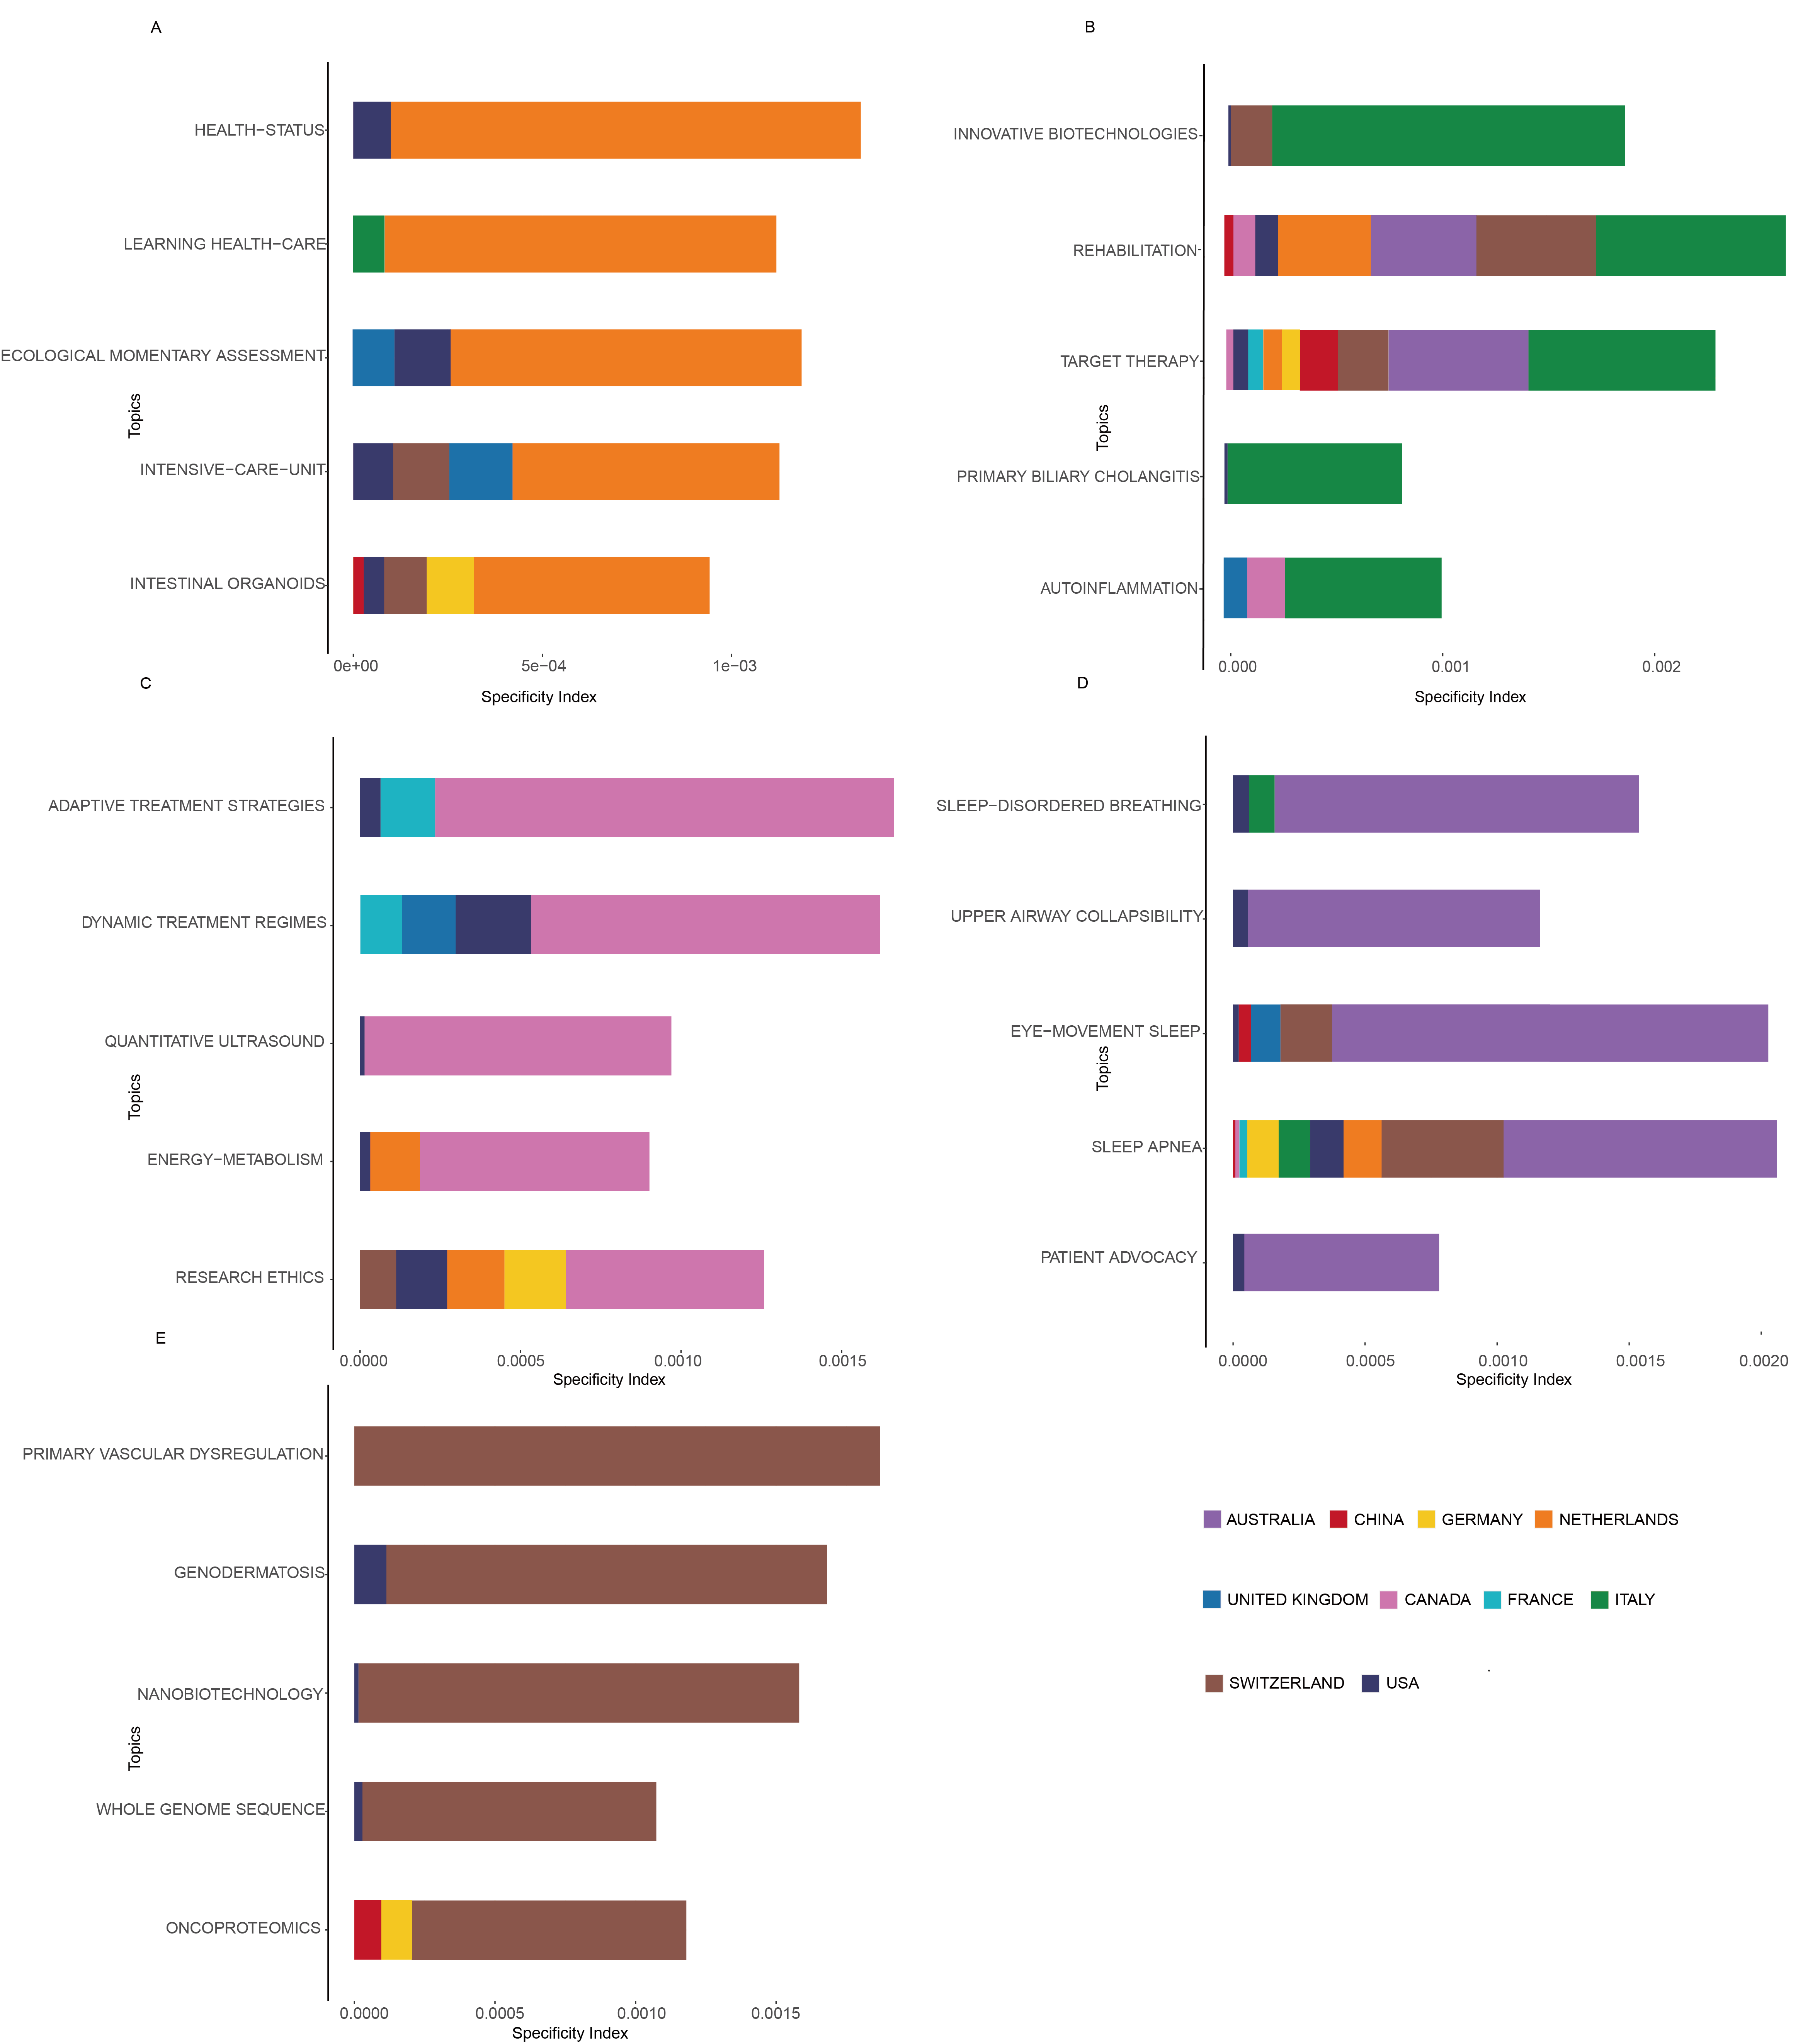


Supplementary Figure 3 Analysis of the themes categories evolution of Precision Medicine. (A)Top 5 country-specific theme categories in the Netherlands. (B)Top 5 country-specific theme categories in the Italy.(C) Top 5 country-specific theme categories in Canada.(D) Top 5 country-specific themes categories in Australia. (E) Top 5 country-specific themes categories in Switzerland.
